# Supplementary material
Source: HighWire-hosted journal article supplement (https://www.annfammed.org/content/suppl/2020/01/07/18.1.24)
Supplement: Aoki_Supp_Tables_1-2.pdf [file Aoki_Supp_Tables_1-2.pdf]

## Supplemental materials for:

Aoki T, Yamamoto Y, Fukuhara S. Comparison of primary care experience in hospital-based practices and community-based office practices in Japan. *Ann Fam Med*. 2020;18(1):24-29.

**Supplemental Table 1. Characteristics of participating facilities**

| Facility ID | Location               | Address                                   | Municipality population |
|-------------|------------------------|-------------------------------------------|-------------------------|
| 1           | Community-based office | Kawaguchi City, Saitama Prefecture        | 578,112                 |
| 2           | Community-based office | Adachi Ward, Tokyo                        | 670,122                 |
| 3           | Community-based office | Kita Ward, Tokyo                          | 341,076                 |
| 4           | Community-based office | Matsudo City, Chiba Prefecture            | 483,480                 |
| 5           | Community-based office | Kawasaki City, Kanagawa Prefecture        | 1,475,213               |
| 6           | Community-based office | Kawasaki City, Kanagawa Prefecture        | 1,475,213               |
| 7           | Community-based office | Fukui City, Fukui Prefecture              | 265,904                 |
| 8           | Community-based office | Nanao City, Ishikawa Prefecture           | 55,325                  |
| 9           | Community-based office | Toyokawa City, Aichi Prefecture           | 182,436                 |
| 10          | Community-based office | Konan City, Shiga Prefecture              | 54,289                  |
| 11          | Community-based office | Kyoto City, Kyoto Prefecture              | 1,475,183               |
| 12          | Community-based office | Fukuchiyama City, Kyoto Prefecture        | 78,935                  |
| 13          | Community-based office | Osaka City, Osaka Prefecture              | 8,839,469               |
| 14          | Community-based office | Osaka City, Osaka Prefecture              | 8,839,469               |
| 15          | Community-based office | Osaka City, Osaka Prefecture              | 8,839,469               |
| 16          | Community-based office | Osaka City, Osaka Prefecture              | 8,839,469               |
| 17          | Community-based office | Osaka City, Osaka Prefecture              | 8,839,469               |
| 18          | Community-based office | Amagasaki City, Hyogo Prefecture          | 452,563                 |
| 19          | Community-based office | Higashikunisaki District, Oita Prefecture | 1,830                   |
| 20          | Hospital               | Kita Ward, Tokyo                          | 341,076                 |
| 21          | Hospital               | Nerima Ward, Tokyo                        | 721,722                 |
| 22          | Hospital               | Koutou Ward, Tokyo                        | 498,109                 |
| 23          | Hospital               | Minamiuonuma District, Niigata Prefecture | 7,958                   |
| 24          | Hospital               | Kyoto City, Kyoto Prefecture              | 1,475,183               |
| 25          | Hospital               | Amagasaki City, Hyogo Prefecture          | 452,563                 |

**Supplemental Table 2. Item contents of the Japanese version of Primary Care Assessment Tool**

| <b>First contact</b>                                                                                                                 | <b>Strongly agree</b> | <b>Somewhat agree</b> | <b>Not sure</b> | <b>Somewhat disagree</b> | <b>Strongly disagree</b> |
|--------------------------------------------------------------------------------------------------------------------------------------|-----------------------|-----------------------|-----------------|--------------------------|--------------------------|
| 1. When your Primary Care Practice is closed, is there a phone number you can call when you get sick?                                | 5                     | 4                     | 3               | 2                        | 1                        |
| 2. When your Primary Care Practice is closed on Saturday and Sunday and you get sick, would someone from there see you the same day? | 5                     | 4                     | 3               | 2                        | 1                        |
| 3. When your Primary Care Practice is closed and you get sick during the night, would someone from there see you that night?         | 5                     | 4                     | 3               | 2                        | 1                        |
| <b>Longitudinality</b>                                                                                                               | <b>Strongly agree</b> | <b>Somewhat agree</b> | <b>Not sure</b> | <b>Somewhat disagree</b> | <b>Strongly disagree</b> |
| 1. Does your Primary Care Physician (PCP) give you enough time to talk about your worries or problems?                               | 5                     | 4                     | 3               | 2                        | 1                        |
| 2. Do you feel comfortable telling your PCP about your worries or problems?                                                          | 5                     | 4                     | 3               | 2                        | 1                        |
| 3. Does your PCP know you very well as a person, rather than as someone with a medical problem?                                      | 5                     | 4                     | 3               | 2                        | 1                        |
| 4. Does your PCP know what problems are most important to you?                                                                       | 5                     | 4                     | 3               | 2                        | 1                        |
| 5. Does your PCP know your complete medical history?                                                                                 | 5                     | 4                     | 3               | 2                        | 1                        |
| <b>Coordination</b>                                                                                                                  | <b>Strongly agree</b> | <b>Somewhat agree</b> | <b>Not sure</b> | <b>Somewhat disagree</b> | <b>Strongly disagree</b> |
| 1. Have you ever had a visit to any kind of specialist or special service?                                                           |                       | Yes                   |                 | No/Not sure              |                          |
| 2. Did your PCP suggest you go to the specialist or special service?                                                                 | 5                     | 4                     | 3               | 2                        | 1                        |
| 3. Did your PCP discuss with you different places you could have gone to get help with that problem?                                 | 5                     | 4                     | 3               | 2                        | 1                        |
| 4. Did your PCP or someone working with your PCP help you make the appointment for that visit?                                       | 5                     | 4                     | 3               | 2                        | 1                        |
| 5. Did your PCP write down any information for the specialist about the reason for the visit?                                        | 5                     | 4                     | 3               | 2                        | 1                        |
| 6. Does your PCP know what the results of the visit were?                                                                            | 5                     | 4                     | 3               | 2                        | 1                        |
| <b>Comprehensiveness (services available)</b>                                                                                        | <b>Strongly agree</b> | <b>Somewhat agree</b> | <b>Not sure</b> | <b>Somewhat disagree</b> | <b>Strongly disagree</b> |
| For each one, please indicate whether it is available at your PCP's office.                                                          |                       |                       |                 |                          |                          |
| 1. Counseling for mental health problems                                                                                             | 5                     | 4                     | 3               | 2                        | 1                        |
| 2. Changes in mental or physical abilities that are normal with getting older                                                        | 5                     | 4                     | 3               | 2                        | 1                        |
| 3. Counseling related to dementia                                                                                                    | 5                     | 4                     | 3               | 2                        | 1                        |
| 4. Counseling related to abuse                                                                                                       | 5                     | 4                     | 3               | 2                        | 1                        |
| 5. Counseling related to personal preferences about end of life issues                                                               | 5                     | 4                     | 3               | 2                        | 1                        |
| <b>Comprehensiveness (services provided)</b>                                                                                         | <b>Strongly agree</b> | <b>Somewhat agree</b> | <b>Not sure</b> | <b>Somewhat disagree</b> | <b>Strongly disagree</b> |
| In visits to your PCP, are any of the following subjects discussed with you?                                                         |                       |                       |                 |                          |                          |
| 1. Advice about appropriate exercise for you                                                                                         | 5                     | 4                     | 3               | 2                        | 1                        |
| 2. Advice about regular bowel movements                                                                                              | 5                     | 4                     | 3               | 2                        | 1                        |
| 3. Advice about over-the-counter medications                                                                                         | 5                     | 4                     | 3               | 2                        | 1                        |
| 4. Advice about medical information in the media: on TV, in the newspaper, etc.                                                      | 5                     | 4                     | 3               | 2                        | 1                        |

|                                                                                                       |                |                |          |                   |                   |
|-------------------------------------------------------------------------------------------------------|----------------|----------------|----------|-------------------|-------------------|
| 5. Advice about a healthy balance of work and rest                                                    | 5              | 4              | 3        | 2                 | 1                 |
| <b>Community orientation</b>                                                                          | Strongly agree | Somewhat agree | Not sure | Somewhat disagree | Strongly disagree |
| 1. Does anyone at your PCP's office ever make home visits?                                            | 5              | 4              | 3        | 2                 | 1                 |
| 2. Does your PCP know about the important health problems of your community?                          | 5              | 4              | 3        | 2                 | 1                 |
| 3. Does your PCP get opinions and ideas from people that will help to provide better health care?     | 5              | 4              | 3        | 2                 | 1                 |
| 4. Does your PCP investigate whether the available health care is meeting the needs of the community? | 5              | 4              | 3        | 2                 | 1                 |
| 5. Does your PCP investigate the concerns people have about health problems in your community?        | 5              | 4              | 3        | 2                 | 1                 |
